# Supplementary material for: An essential domain of an early-diverged RNA polymerase II functions to accurately decode a primitive chromatin landscape
Source: PubMed Central journal article supplement — Nucleic Acids Res. 2017 May 26;45(13):7886–96. doi: 10.1093/nar/gkx486 (PMC5570084; doi:10.1093/nar/gkx486), 2017-05-26
Supplement: gkx486_supp.pdf [file gkx486_supp.pdf]

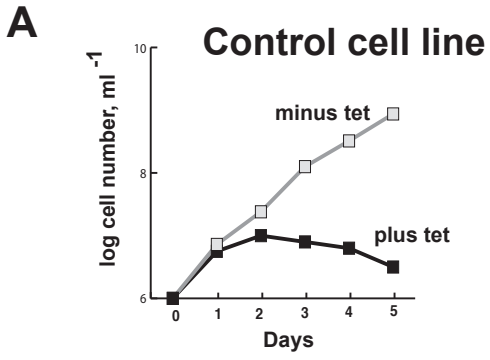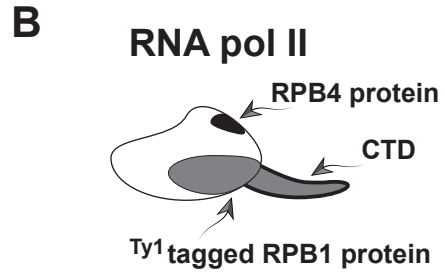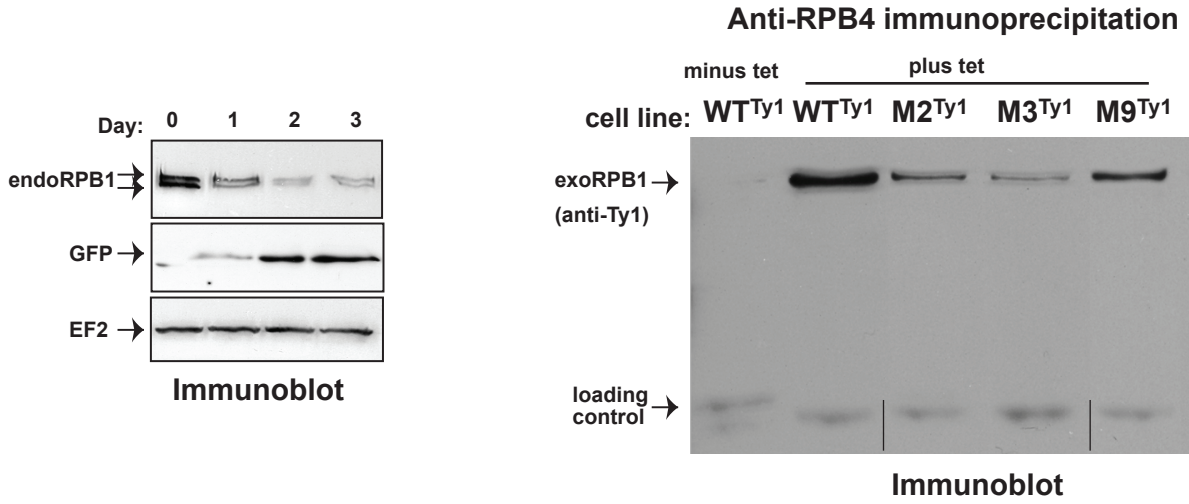

**Figure S1.**

## RNA polymerase II assays

### A Experimental Design

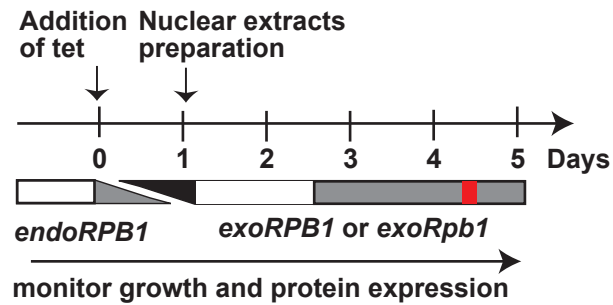

### RNA polymerase II assay scheme

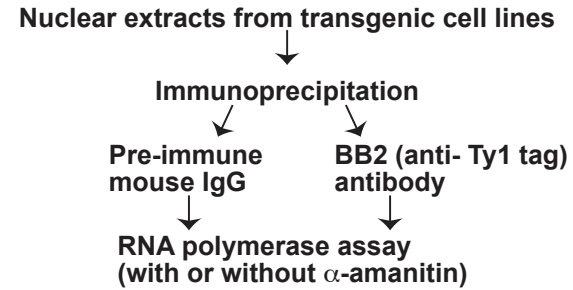

### B RNA polymerase II assay

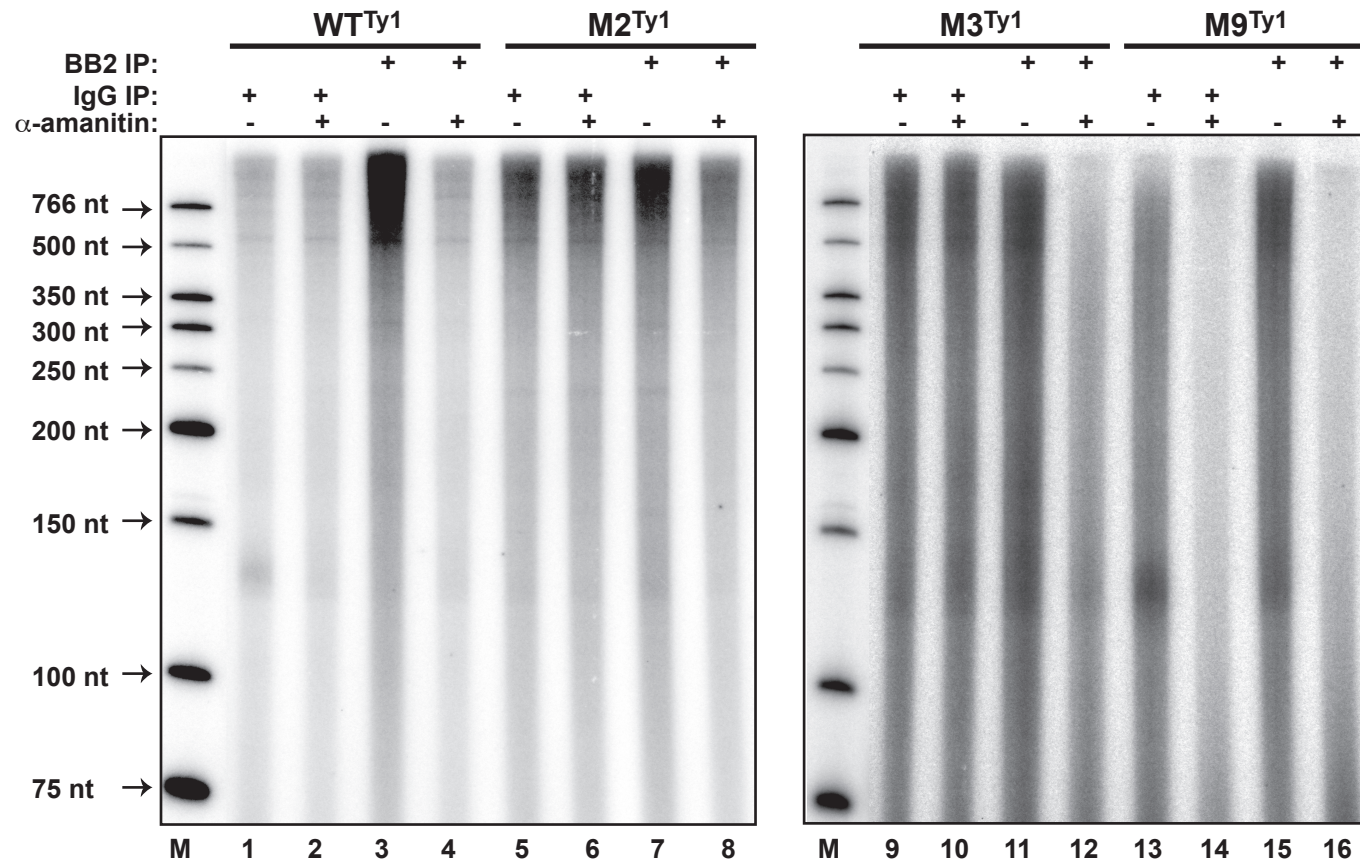

Figure S2.

PhosphorImage

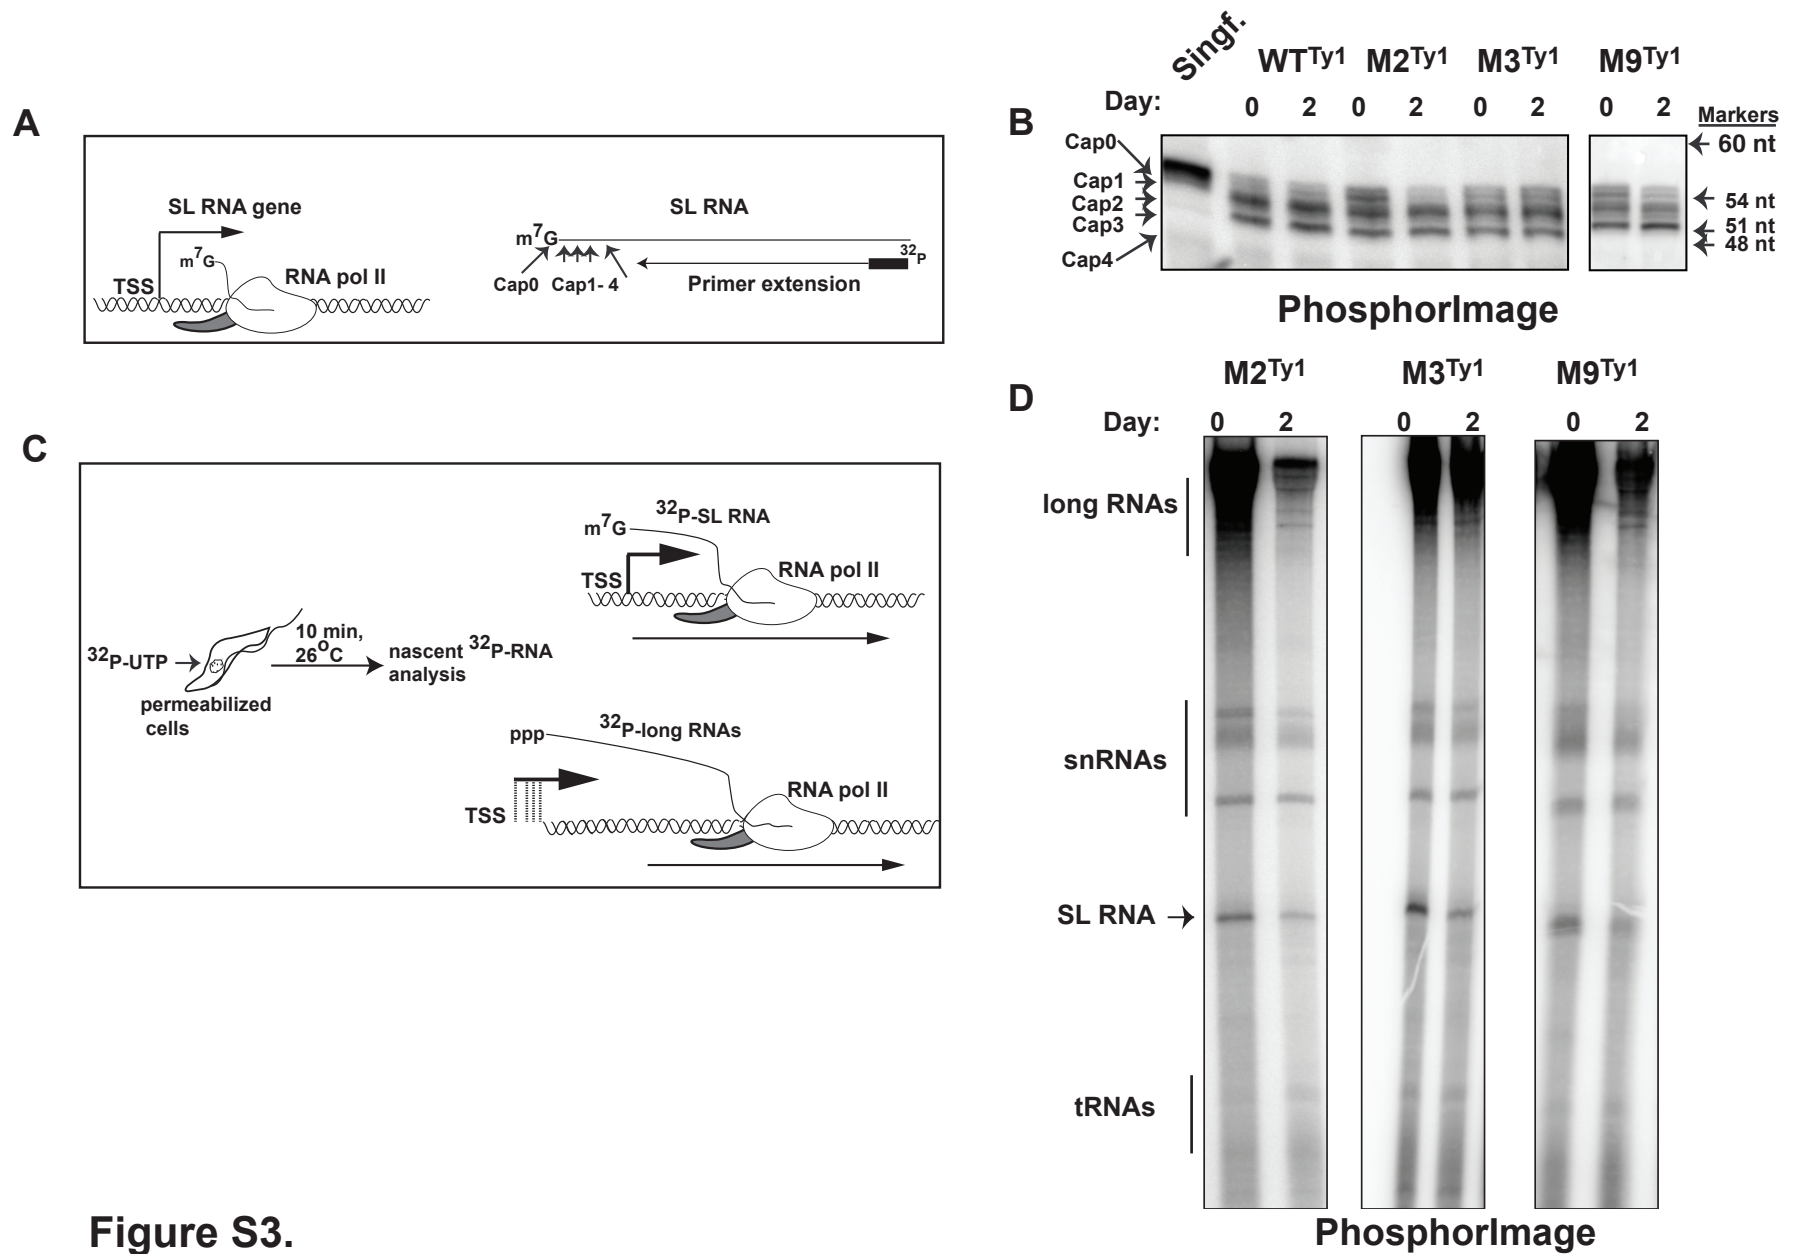

**Figure S3.**

**$^{32}$ P-UTP incorporation on Day 2, compared to Day 0**

|                    | <b>M2Ty1</b> | <b>M3Ty1</b> | <b>M9Ty1</b> |
|--------------------|--------------|--------------|--------------|
| <b>% long RNAs</b> | <b>31</b>    | <b>91</b>    | <b>49</b>    |
| <b>% SL RNA</b>    | <b>66</b>    | <b>75</b>    | <b>81</b>    |

snRNAs are used as internal control

## Gene expression change on Day 1

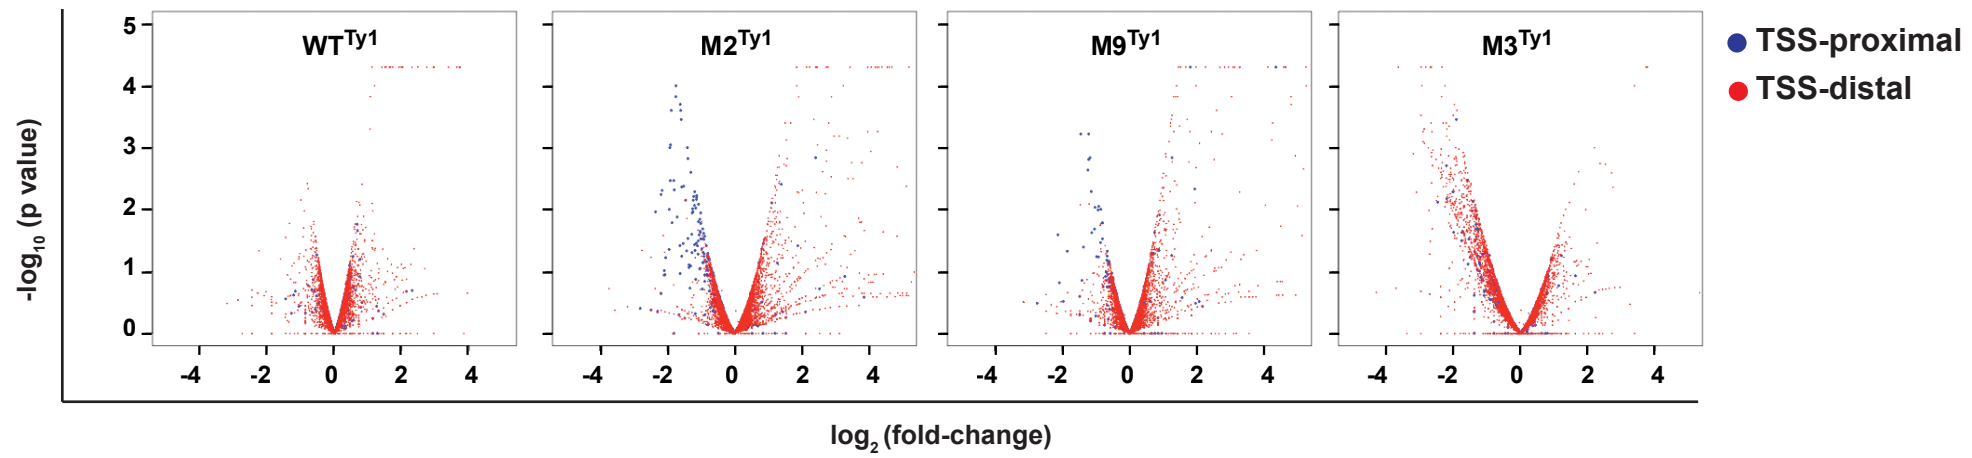

Figure S4.

**A** Chr 3 (1.65 Mb)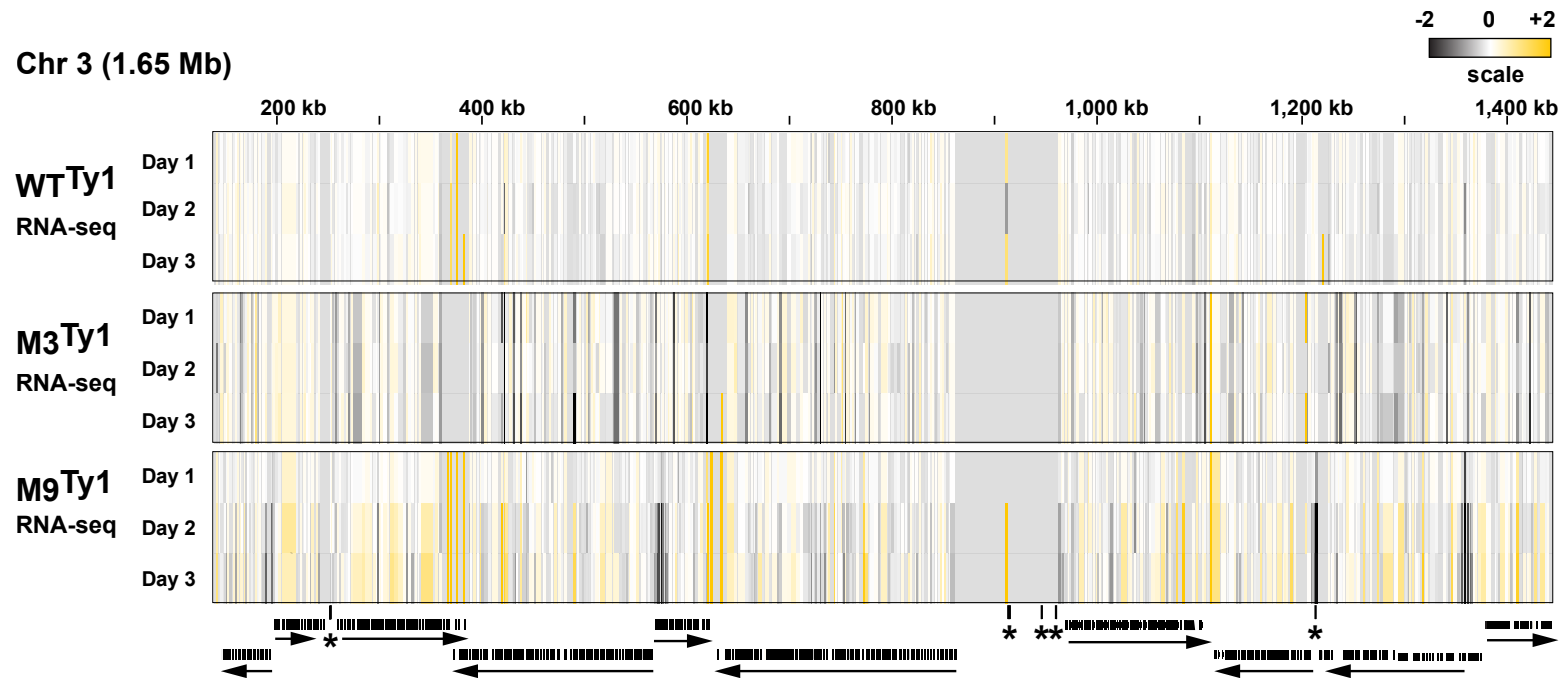**B** Chr 7 (2.20 Mb)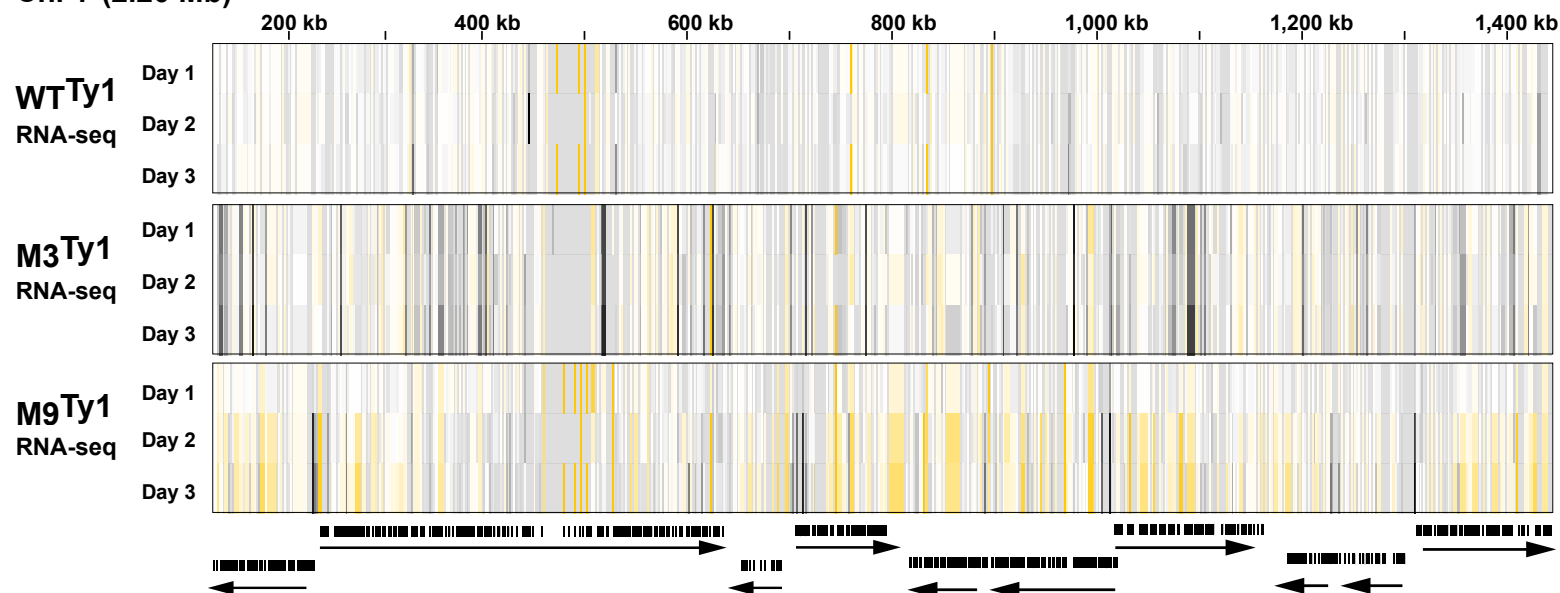**Figure S5.**

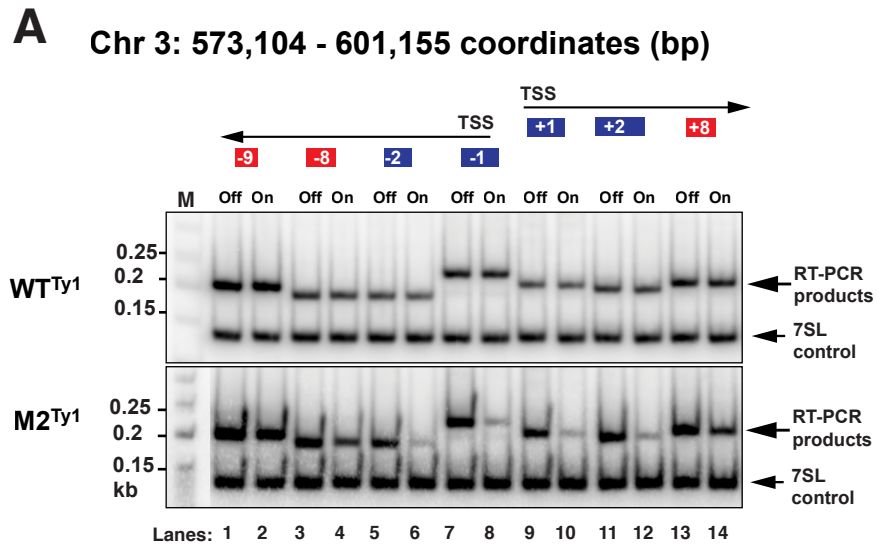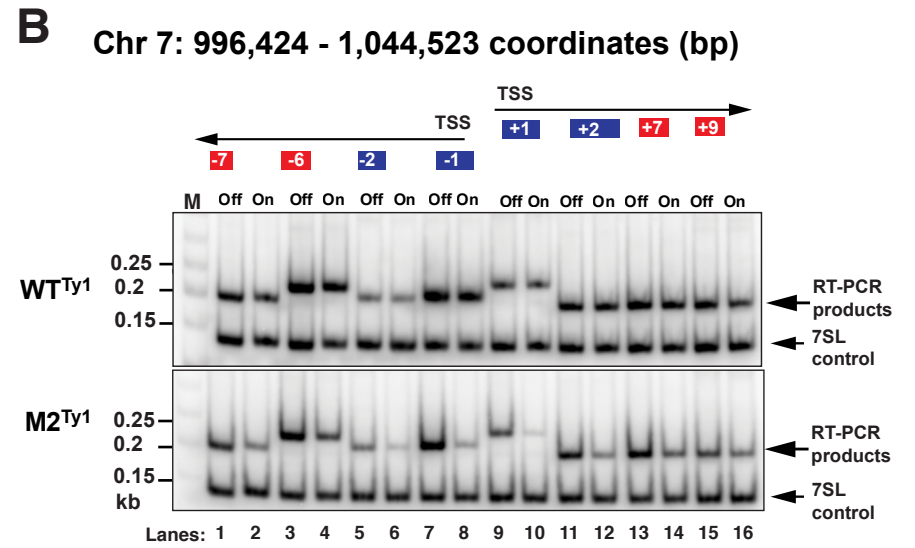

Figure S6.

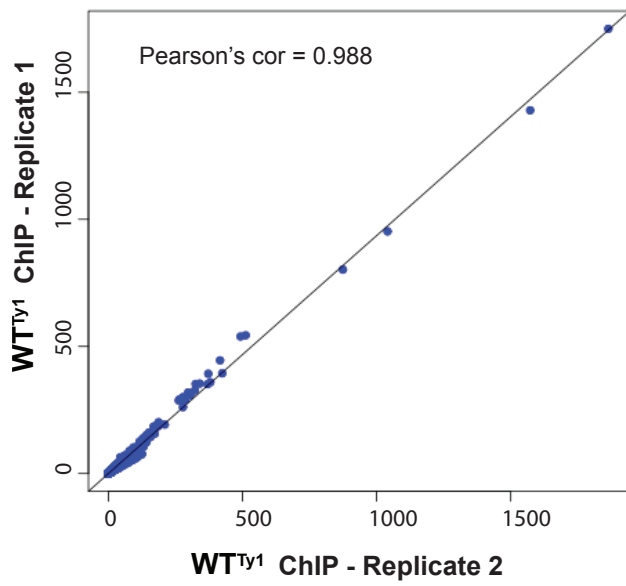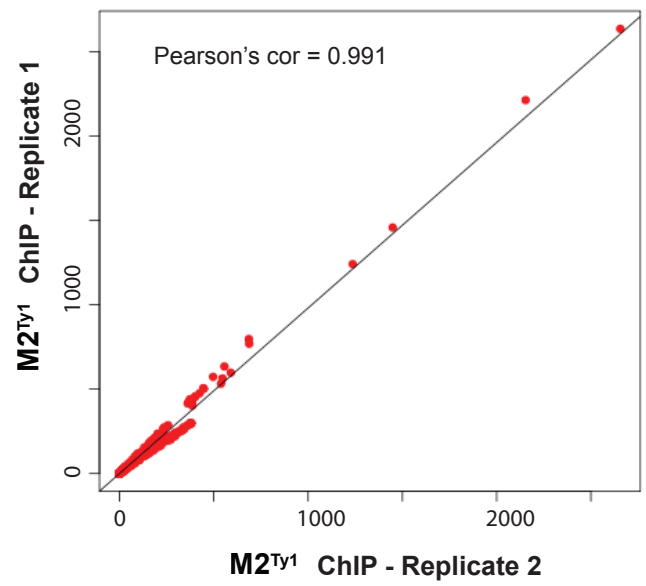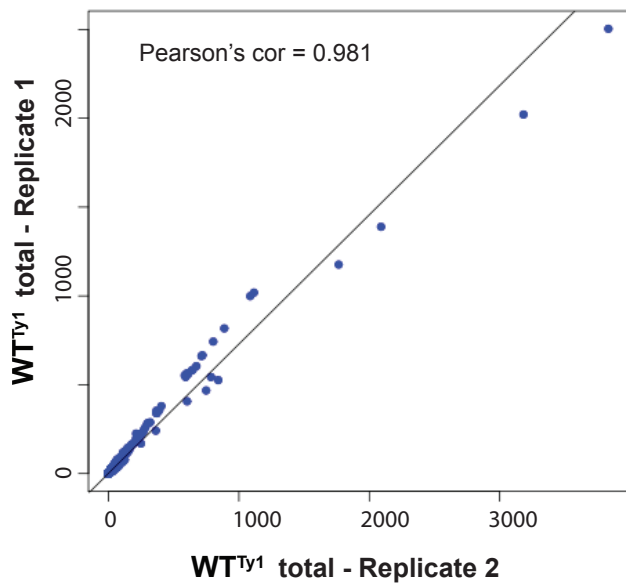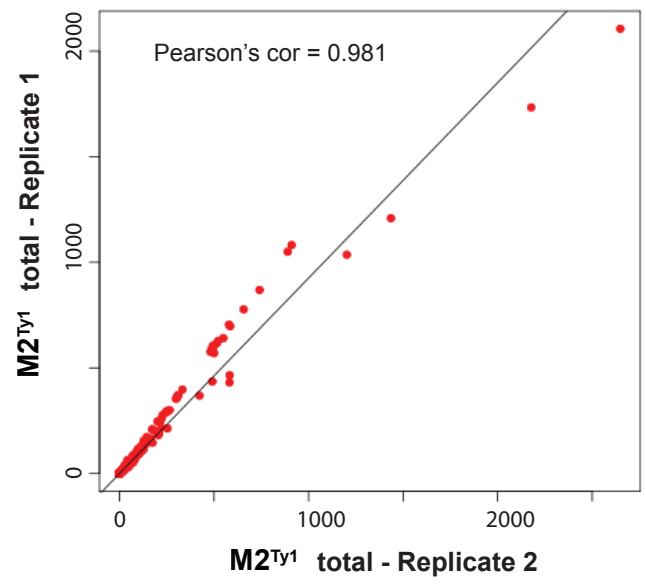

**Figure S7.**

### ChIP enrichment on genes

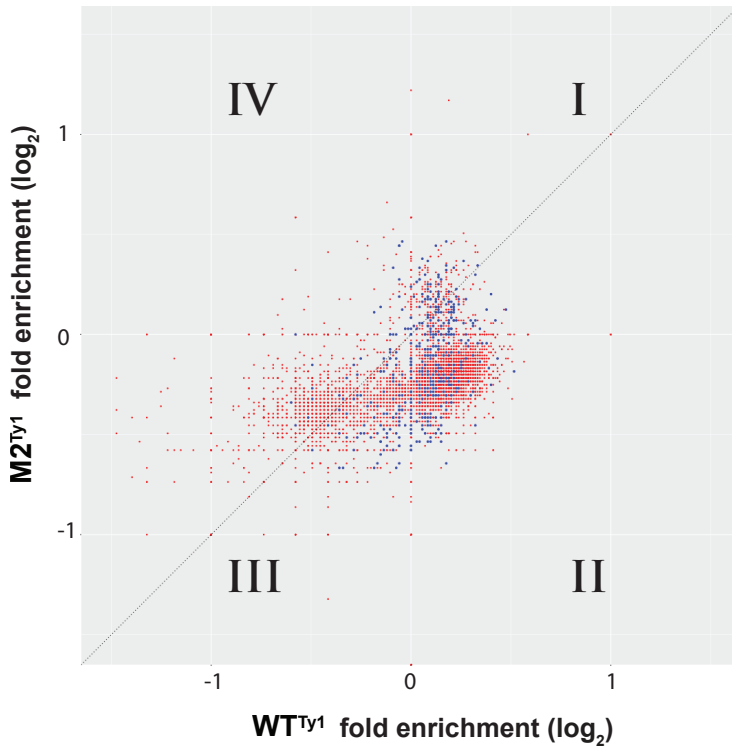

- TSS-proximal
- TSS-distal

|                              |                              |
|------------------------------|------------------------------|
| IV<br>blue: 16<br>red: 222   | I<br>blue: 135<br>red: 528   |
| III<br>blue: 93<br>red: 2037 | II<br>blue: 177<br>red: 6645 |

Figure S8.



**Chr 6 (1.62 Mb)**

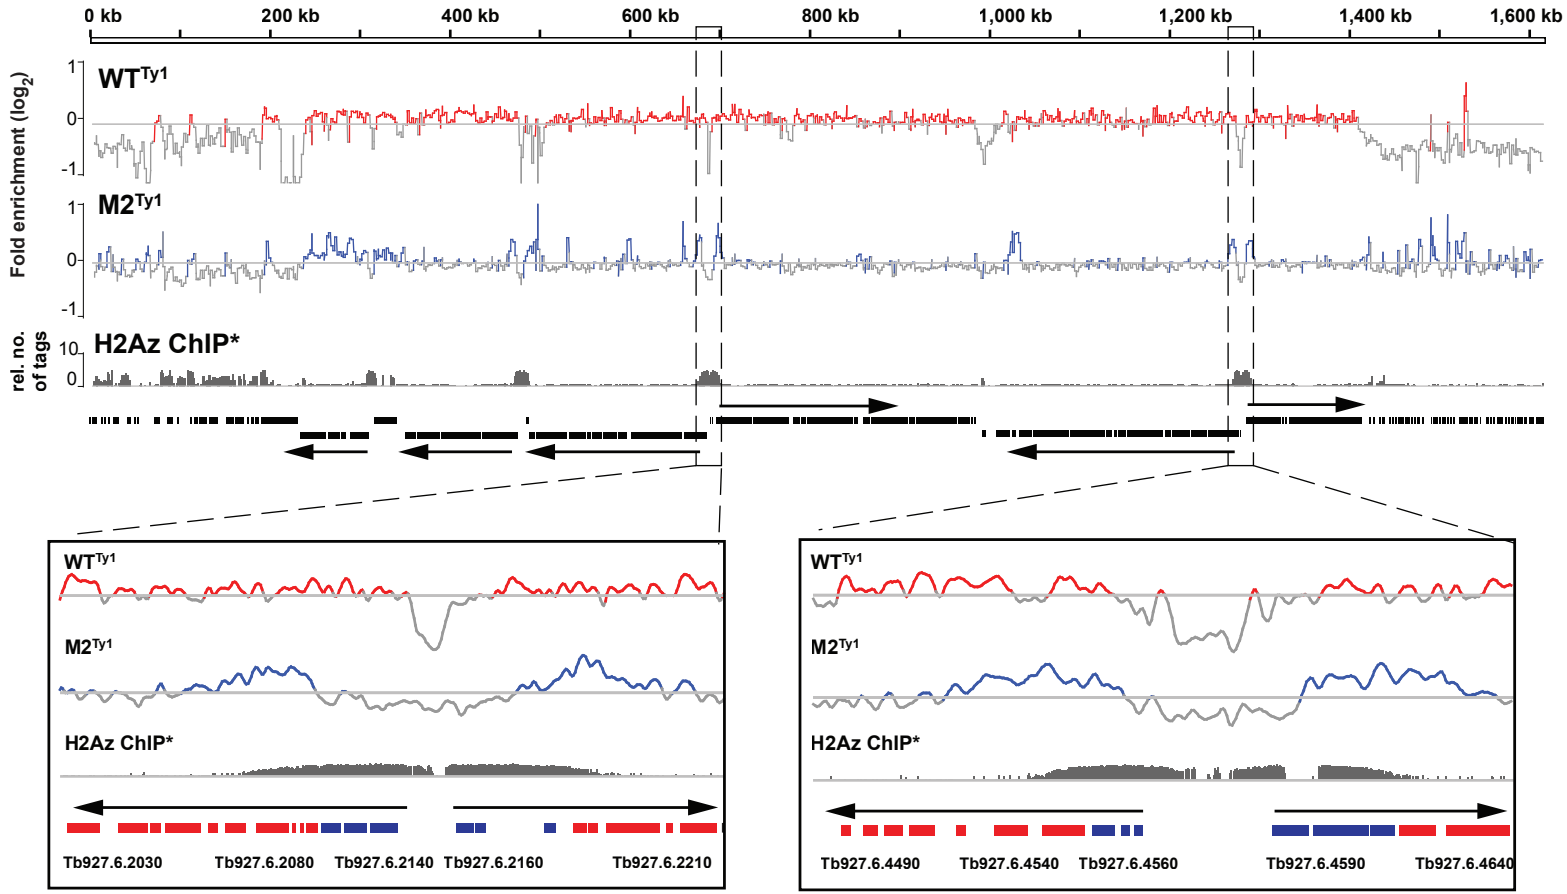

**Chr 7 (2.20 Mb)**

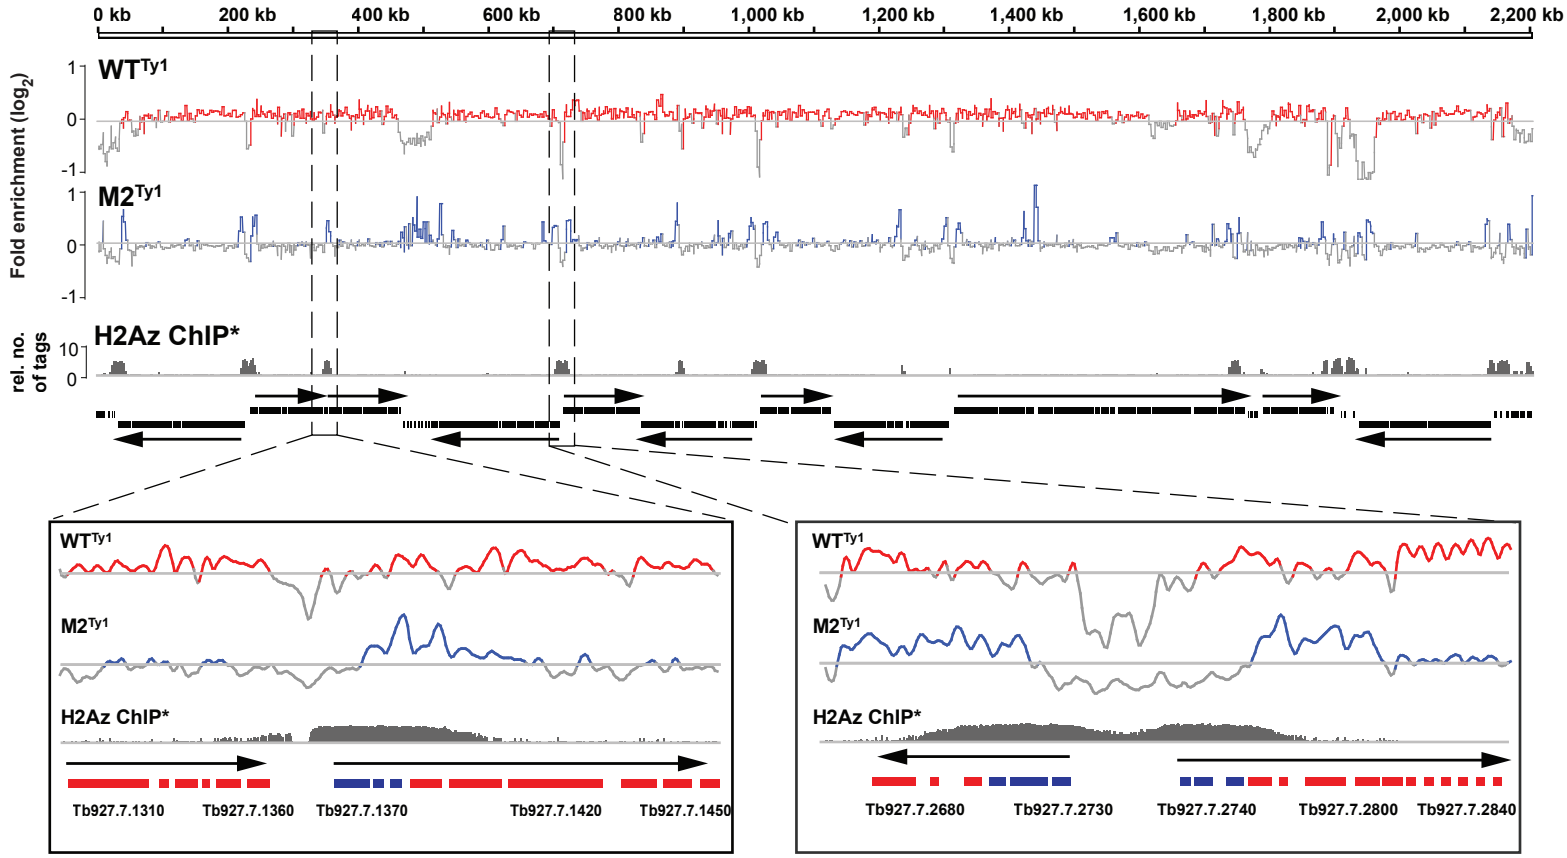

**Figure S9.**

Chr 3: 567,712 - 608,724 (40 kb)

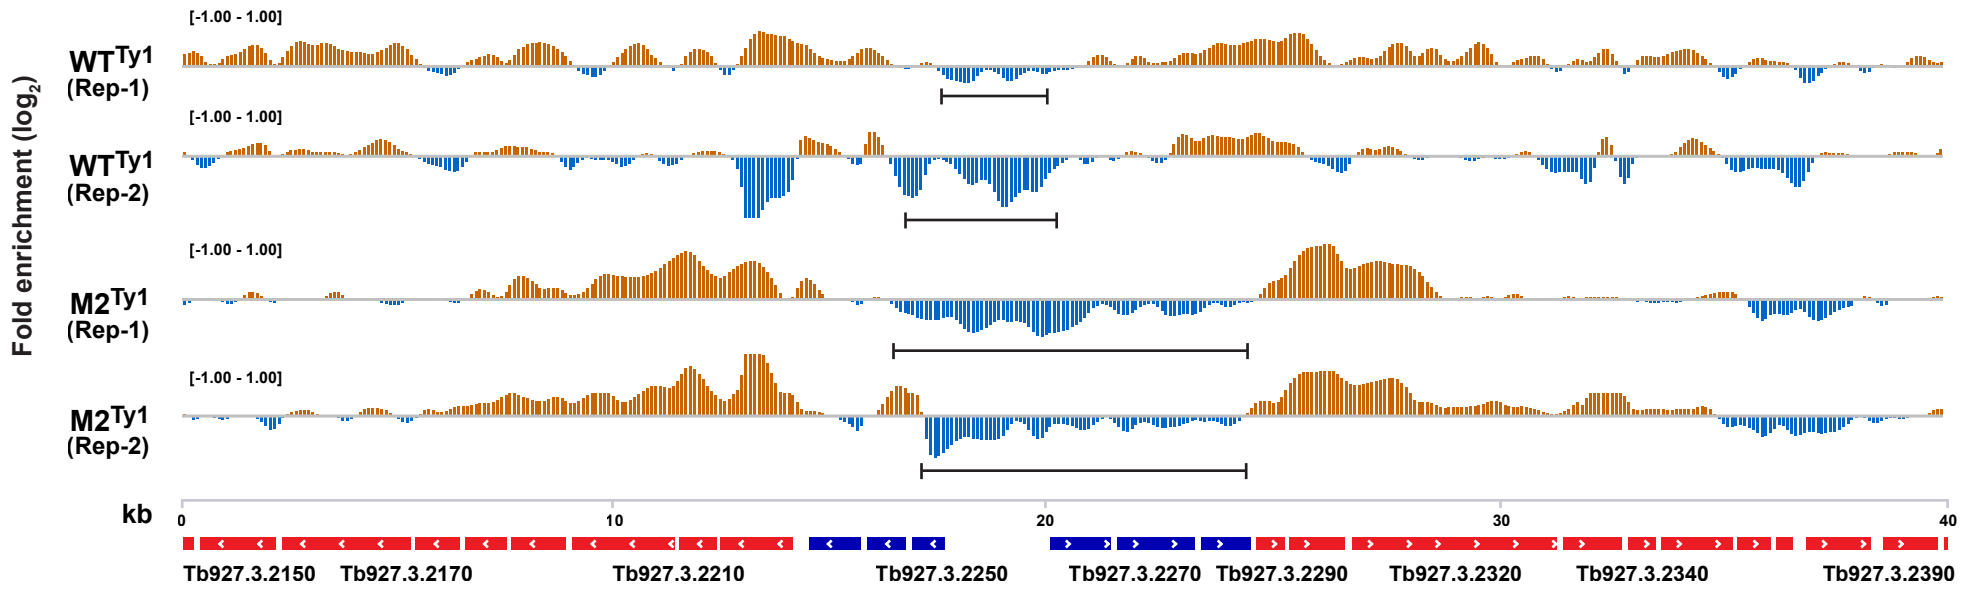

Chr 8: 605,619 - 645,882 (40 kb)

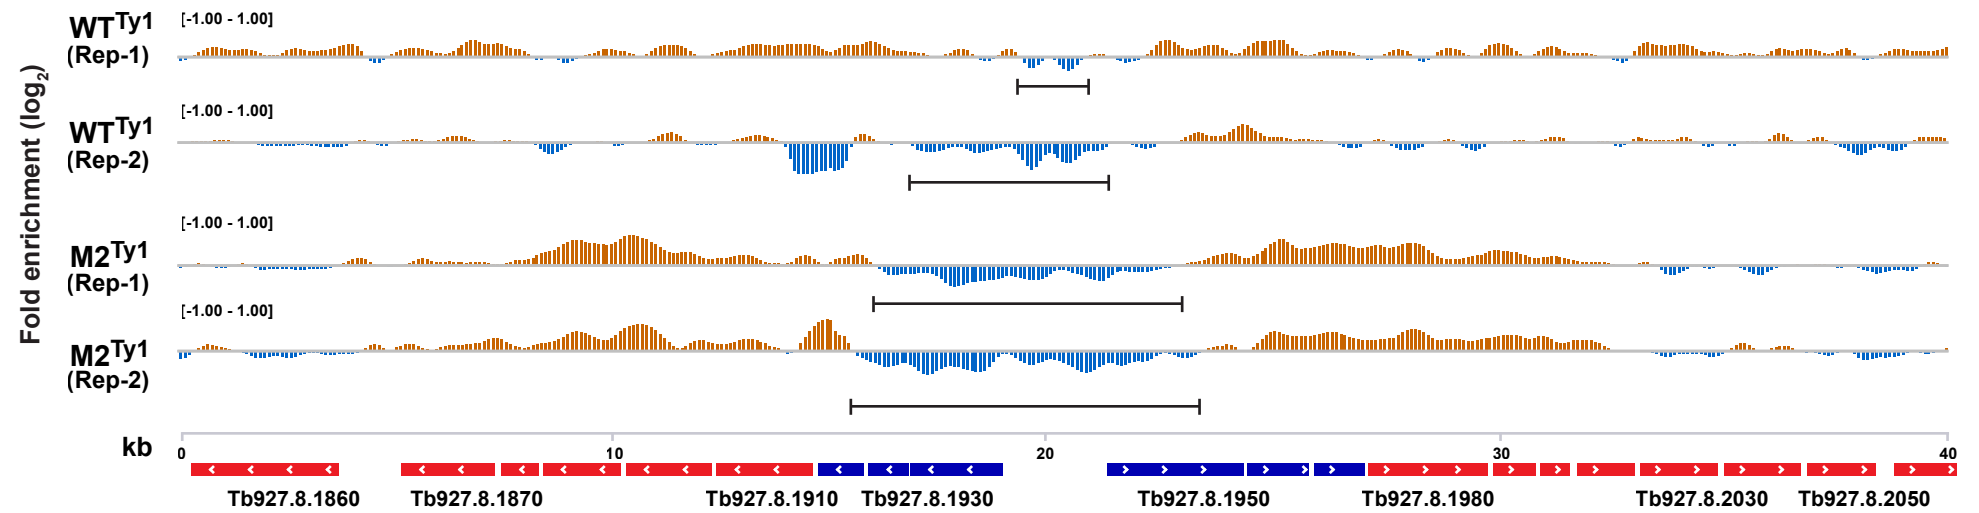

Figure S10

### Chromatin Immunoprecipitation of RNA pol II

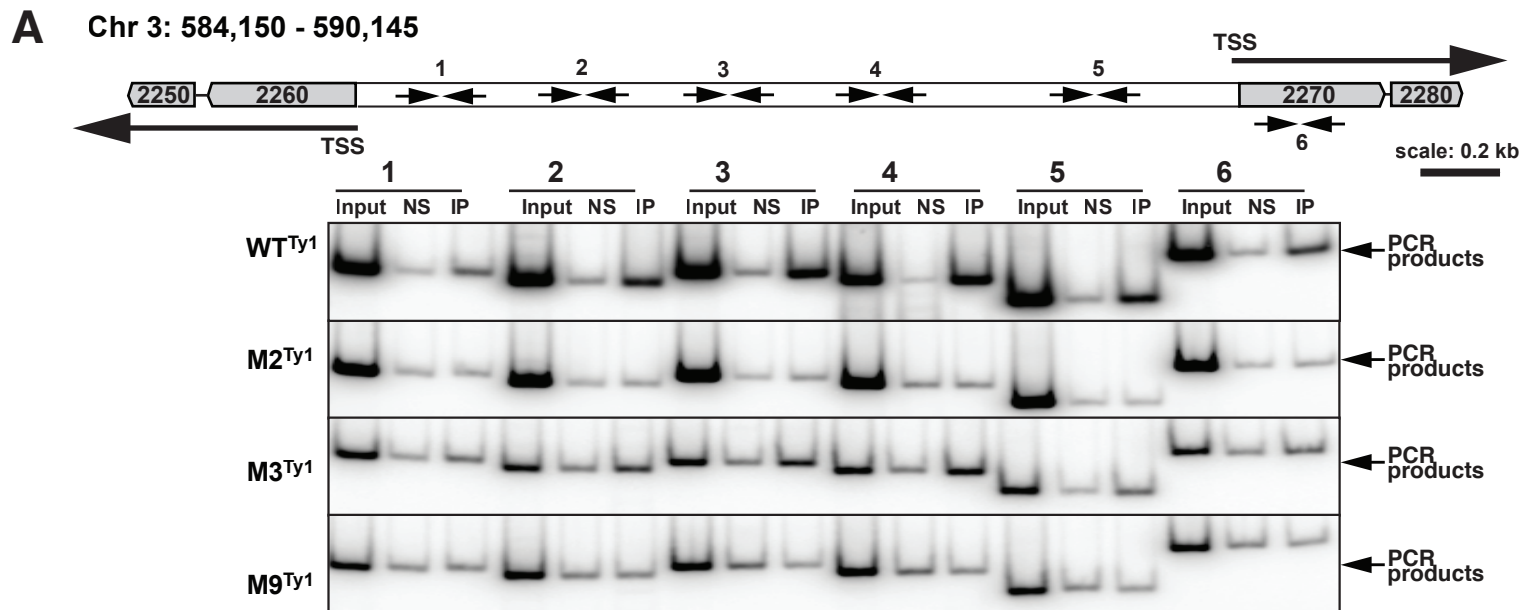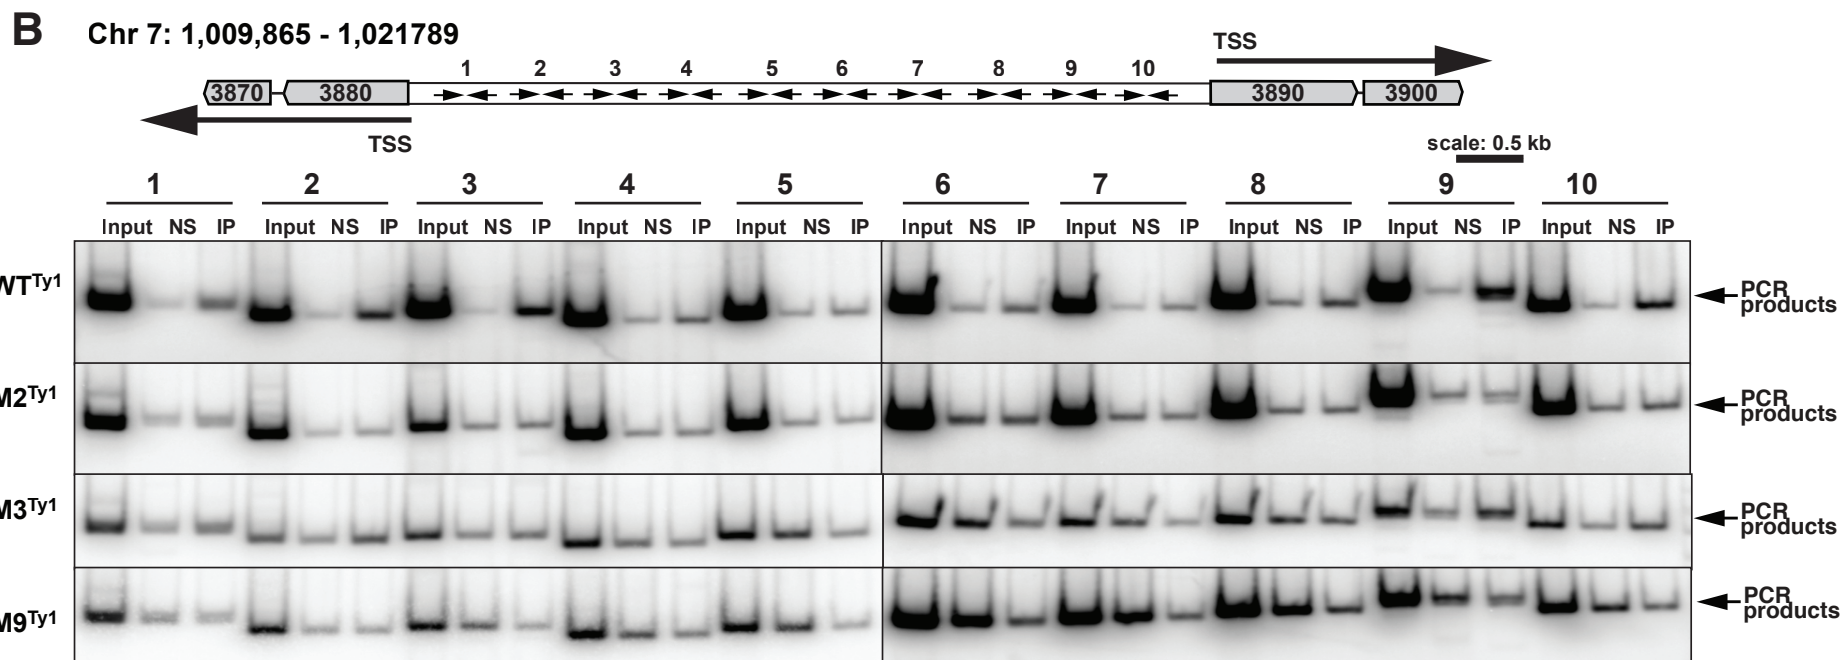

Figure S11.

## Supplementary Material Figure legends

**Figure S1:** Description of the molecular genetic system for experimentation.

(A) (Top) Growth curves of Control cell line in the absence (gray squares) and presence (black squares) of tetracycline. (Bottom) Immunoblots show depletion of endoRPB1 (top panel, anti-RPB1) after addition of tetracycline and simultaneous inducible expression of GFP (middle panel, anti-GFP). GFP was the inducible 'control' gene present in the Control cell line. Anti-EF2 immunoblot (bottom panel) is loading control.

(B) Tagged-wild-type CTD or tagged-mutant CTD proteins are incorporated into the RNA pol II complex. (Top) Illustration of RNA pol II showing RPB4 (black; a subunit of RNA pol II), and RPB1 (gray; the largest subunit of RNA pol II) with its CTD (outlined black tail). (Bottom) Immunoblot analysis of RNA pol II, immunoprecipitated with anti-RPB4 antibodies, from whole cell extracts prepared before (minus tet) and after (plus tet) addition with tetracycline. Presence of tagged protein (anti-Ty1) indicates their existence in the RNA pol II complex. An unknown ~25kD protein that cross-reacts with anti-Ty1 is loading control.

**Figure S2:** Tagged-wild-type and tagged-mutant RNA pol II complexes are transcriptionally competent.

(A) Schematics of RNA pol II activity assay. Tagged-RNA pol II complexes, immunoprecipitated (anti-Ty1) from nuclear extracts, were subjected to transcription (polymerase) assays. Mouse pre-immune IgG served as negative control in immunoprecipitation.

(B) PhosphoImage<sup>TM</sup> analysis of [<sup>32</sup>P]-UTP incorporated RNA synthesis indicates transcriptionally competent tagged-RNA pol II complexes in all four cell lines (lanes 3, 7, 11, 15). In each case RNA synthesis activity is inhibited by the RNA pol II inhibitor  $\alpha$ -amanitin (100  $\mu$ g/ml) (lanes 4, 8, 12, 16). RNA synthesis is absent in control reactions (lanes 1, 2, 5, 6, 9, 10, 13, 14). Assay shown is representative of two experiments completed for the cell lines.

**Figure S3:** SL RNA and long RNA synthesis in transgenic cell lines.

(A) and (B) SL RNA and its cap hypermethylation levels are maintained in all four cell lines, as shown by primer extension analyses of total RNA isolated before (Day 0) and two days after (Day 2) induction of tagged proteins by addition of tetracycline.

(C) and (D) Long RNA synthesis in M2<sup>Ty1</sup> and M9<sup>Ty1</sup> cells is significantly reduced after two days of tagged-protein expression, as demonstrated by nascent RNA synthesis ([<sup>32</sup>P]-UTP incorporation). M3<sup>Ty1</sup> maintained comparable synthesis of long mRNA. Moderate decreases in SL RNA synthesis were observed in all three cell lines. RNA synthesis activities on Day 2, compared to Day 0, are calculated by

measuring band intensities using ImageJ software. In all cases, data analyses included normalization to comparable cell numbers.

**Figure S4:** Reduced expression of TSS-proximal genes in M2<sup>Ty1</sup> and M9<sup>Ty1</sup> cells is evident after one day of tetracycline induction.

Volcano plots, similar to Figure 2C, for WT<sup>Ty1</sup>, M2<sup>Ty1</sup>, M9<sup>Ty1</sup> and M3<sup>Ty1</sup> cells, showing gene expression ( $\log_2$ -fold changes) versus adjusted significance p-values ( $\log_{10}$ ) for all protein coding genes (mRNA-Seq). The set of 482 TSS-proximal genes is highlighted in blue; all other genes (~8000) are shown in red.

**Figure S5:** Heat map views of WT<sup>Ty1</sup>, M3<sup>Ty1</sup> and M9<sup>Ty1</sup> cells.

Heat map views, similar to Figure 2, of gene expression changes (FPKM,  $\log_2$  of fold-change) in WT<sup>Ty1</sup>, M3<sup>Ty1</sup> and M9<sup>Ty1</sup> cells from chromosome 3 (A) and chromosome 7 (B) after Day 1, Day 2 and Day 3 of tetracycline induction compared to uninduced cells. Yellow and black show increases and decreases in expression, respectively.

**Figure S6:** mRNA synthesis alterations from TSS-proximal genes as determined by reverse transcription-PCR analyses.

PhosphorImages<sup>TM</sup> of reverse transcription-PCR analyses of transcript levels of genes nearby two typical TSSs; one in chromosome 3 (A) and the other in chromosome 7 (B) in WT<sup>Ty1</sup> (top panel) and M2<sup>Ty1</sup> (bottom panel) cells before (Off) and after (On) two days of tetracycline addition. Black arrows indicate orientations of polycistronic transcription units, with genes numbered according to their position in each polycistronic unit; positive and negative numbers indicate top and bottom strand coding. Blue identifies TSS-proximal protein coding genes and red indicates TSS-distal protein coding genes. The RNA pol III-dependent 7SL RNA serves as internal control.

**Figure S7:** Statistical evaluation of ChIP-Seq data.

ChIP-Seq analyses show high correlation between two biological replicate data sets as determined by correlation plot (WT<sup>Ty1</sup> ChIP, Pearson's cor = 0.988, M2<sup>Ty1</sup> ChIP, 0.991, WT<sup>Ty1</sup> total DNA, 0.981, and M2<sup>Ty1</sup> total DNA, 0.981). Genome-wide reads, covering every 100-base region in the genome, are counted, normalized per million reads and compared.

**Figure S8:** Scatter plot of ChIP-enrichment for all RNA pol II- dependent coding region genes (open reading frames).

The ChIP data analyzed do not include the RNA pol I-dependent coding regions genes (which exist in a few cases in the *Trypanosoma brucei* genome), and does not include the RNA pol II-dependent Spliced leader genes (which contain only non-coding RNA). The TSS-proximal genes, defined as the first three open reading frames in a polygenic unit, regardless of their distance from the H2Az, H2BV, H4K10ac and BDF3 marks localized upstream from and within the proximal regions of polygenic transcription units, are in blue (12,13). All other

open reading frames are designated as TSS-distal genes and are shown in red. The purpose of this labeling is to be commensurate with the open reading frame labeling in the RNA-seq analysis of Fig. 2 and 3. Although TSS-distal genes increase in number in the order of quadrant IV, I, III and II, TSS- proximal genes increase in number in the order of quadrant IV, III, I and II. These data suggest differences between the TSS-proximal and distal genes, as defined in the RNA-seq analysis, reflected in the ChIP seq analysis.

**Figure S9:** Line plot views of chromosome-wide RNA pol II ChIP enrichment data.

Line plot views of chromosome-wide RNA pol II ChIP enrichment relative to total DNA, displayed with IGV browser, on chromosome 6 (top panel) and chromosome 7 (bottom panel) in WT<sup>Ty1</sup> (positive enrichment, red; negative enrichment, gray) and M2<sup>Ty1</sup> (positive enrichment, blue; negative enrichment, gray) cells. Histograms (gray) of variant histone H2Az occupancies (relative number of tags) are also shown (14). Black bars and arrows show coding sequences in polycistronic units and their direction of transcription. The four “zoomed-in” views are the regions between the dashed lines. Genes are color coded as in Figure 3.

**Figure S10:** Reproducibility of ChIP-Seq data.

Histograms, similar to Figure 5, show reproducible RNA pol II ChIP enrichment profile for two biological replicate samples of WT<sup>Ty1</sup> and M2<sup>Ty1</sup> cells. Two ~ 40 kb candidate loci, on chromosomes 3 and 8, that are part of Figure 5 are shown. As in Figure 5, the y-axes represent estimated ChIP enrichment (orange, positive; blue, negative). TSS-proximal and TSS-distal genes are shown in blue and red respectively. Arrows indicate orientation of gene transcription. Numbers on top of gene arrays indicate the length (kb) of the chromosomal regions. The horizontal bar under each histogram marks the TSS regions that are deficient in RNA pol II occupancy.

**Figure S11:** ChIP-PCR analyses of RNA pol II recruitment.

ChIP-PCR analyses indicate RNA pol II recruitment into two TSS regions on chromosome 3 (A), and chromosome 7 (B). PhosphorImages™ of PCR analyses of anti-Ty1 ChIP-enriched DNA from WT<sup>Ty1</sup>, M2<sup>Ty1</sup>, M3<sup>Ty1</sup> and M9<sup>Ty1</sup> cells, following two days of induction are shown. Total DNA (Input), nonspecific (NS) and specific (IP) ChIP reactions are shown. Black arrows indicate PCR primers; numbers indicate corresponding amplicons. Arrows, along with gene IDs, indicate orientations of polycistronic transcription units.

----

**Table S1**

| Cell line         | Background                                                     | Genotype                                                                        | Drug resistance phenotype                                        | Amino acids substitutions in Ty1::rpb1 <sup>Ti</sup> BSD                        | Growth phenotype |
|-------------------|----------------------------------------------------------------|---------------------------------------------------------------------------------|------------------------------------------------------------------|---------------------------------------------------------------------------------|------------------|
| Wild type         | Lister 427                                                     |                                                                                 |                                                                  |                                                                                 | normal           |
| 29-13             | Wild type                                                      | TETR HYG T7RNAP NEO                                                             | Hygromycin, G418. Parent strain for conditional gene expression. |                                                                                 | normal           |
| AD-101            | 29-13 with a tet-inducible RNAi to target endogenous RPB1 mRNA | TETR HYG T7RNAP NEO RIT-RPB1 <sup>Ti</sup> BLE                                  | Hygromycin, G418, Phleomycin                                     |                                                                                 | lethal           |
| WT <sup>Ty1</sup> | AD-101                                                         | TETR HYG T7RNAP NEO RIT-RPB1 <sup>Ti</sup> BLE *Ty1::RPB1 <sup>Ti</sup> BSD     | Hygromycin, G418, Phleomycin, Blastocidin                        |                                                                                 | normal           |
| M1 <sup>Ty1</sup> | AD-101                                                         | TETR HYG T7RNAP NEO RIT-RPB1 <sup>Ti</sup> BLE *Ty1::rpb1 <sup>Ti</sup> -m1 BSD | Hygromycin, G418, Phleomycin, Blastocidin                        | S <sub>1620</sub> A S <sub>1621</sub> A S <sub>1627</sub> A                     | lethal           |
| M2 <sup>Ty1</sup> | AD-101                                                         | TETR HYG T7RNAP NEO RIT-RPB1 <sup>Ti</sup> BLE *Ty1::rpb1 <sup>Ti</sup> -m2 BSD | Hygromycin, G418, Phleomycin, Blastocidin                        | S <sub>1591</sub> A S <sub>1594</sub> A S <sub>1595</sub> A S <sub>1597</sub> A | lethal           |
| M3 <sup>Ty1</sup> | AD-101                                                         | TETR HYG T7RNAP NEO RIT-RPB1 <sup>Ti</sup> BLE *Ty1::rpb1 <sup>Ti</sup> -m3 BSD | Hygromycin, G418, Phleomycin, Blastocidin                        | S <sub>1662</sub> A S <sub>1663</sub> A                                         | normal           |

**Table S1**

|                              |               |                                                                                              |                                                      |                                                                                                                            |               |
|------------------------------|---------------|----------------------------------------------------------------------------------------------|------------------------------------------------------|----------------------------------------------------------------------------------------------------------------------------|---------------|
| <b>M4<sup>Ty1</sup></b>      | <b>AD-101</b> | <b>TETR HYG T7RNAP NEO<br/>RIT-RPB1<sup>Ti</sup> BLE<br/>*Ty1::rpb1<sup>Ti</sup>-m4 BSD</b>  | <b>Hygromycin, G418,<br/>Phleomycin, Blasticidin</b> | <b>S<sub>1651</sub>A<br/>S<sub>1653</sub>A</b>                                                                             | <b>normal</b> |
| <b>M5<sup>Ty1</sup></b>      | <b>AD-101</b> | <b>TETR HYG T7RNAP NEO<br/>RIT-RPB1<sup>Ti</sup> BLE<br/>*Ty1::rpb1<sup>Ti</sup>-m5 BSD</b>  | <b>Hygromycin, G418,<br/>Phleomycin, Blasticidin</b> | <b>S<sub>1585</sub>A S<sub>1587</sub>A<br/>S<sub>1591</sub>A S<sub>1594</sub>A<br/>S<sub>1595</sub>A S<sub>1597</sub>A</b> | <b>lethal</b> |
| <b>M9<sup>Ty1</sup></b>      | <b>AD-101</b> | <b>TETR HYG T7RNAP NEO<br/>RIT-RPB1<sup>Ti</sup> BLE<br/>*Ty1::rpb1<sup>Ti</sup>-m9 BSD</b>  | <b>Hygromycin, G418,<br/>Phleomycin, Blasticidin</b> | <b>S<sub>1651</sub>A S<sub>1653</sub>A<br/>S<sub>1662</sub>A S<sub>1663</sub>A</b>                                         | <b>lethal</b> |
| <b>M17<sup>Ty1</sup></b>     | <b>AD-101</b> | <b>TETR HYG T7RNAP NEO<br/>RIT-RPB1<sup>Ti</sup> BLE<br/>*Ty1::rpb1<sup>Ti</sup>-m17 BSD</b> | <b>Hygromycin, G418,<br/>Phleomycin, Blasticidin</b> | <b>S<sub>1612</sub>A S<sub>1614</sub>A<br/>S<sub>1617</sub>A S<sub>1620</sub>A<br/>S<sub>1621</sub>A S<sub>1627</sub>A</b> | <b>lethal</b> |
| <b>M20<sup>Ty1</sup></b>     | <b>AD-101</b> | <b>TETR HYG T7RNAP NEO<br/>RIT-RPB1<sup>Ti</sup> BLE<br/>*Ty1::rpb1<sup>Ti</sup>-m20 BSD</b> | <b>Hygromycin, G418,<br/>Phleomycin, Blasticidin</b> | <b>M<sub>1589</sub>A M<sub>1593</sub>A</b>                                                                                 | <b>slow</b>   |
| <b>Control<br/>cell line</b> | <b>AD-101</b> | <b>TETR HYG T7RNAP NEO<br/>RIT-RPB1<sup>Ti</sup> BLE<br/>GFP<sup>Ti</sup> BSD</b>            | <b>Hygromycin, G418,<br/>Phleomycin, Blasticidin</b> |                                                                                                                            | <b>lethal</b> |

RIT is derived from the term RIT-seq that refers to RNA interference (RNAi) target sequencing. RIT-RPB1<sup>Ti</sup> describes the use of tetracycline-inducible expression (Ti) of RNAi to ablate endogenous RPB1 mRNA by the targeting of its 3'UTR.

\* Ty1::RPB1<sup>Ti</sup> BSD and Ty1::rpb1<sup>Ti</sup> BSD genes are tetracycline-inducible and RNAi-resistant.

All cell lines are derived from Lister 427 procyclic parasites and are in the 29-13 background, which allows for tetracycline induction of RNAi-target gene knockdown and induction of transgene expression.



**Table S2**

| Cell line               | Days after addition of tetracycline | # of biological samples | Total # of reads | # of reads mapped to Ty1 sequence | # of reads mapped to Ty1 sequence, normalized to 10 M | # of reads mapped to endogenous <i>RPB1</i> normalized to 10 M | # of reads mapped to mutated <i>RPB1</i> normalized to 10 M |
|-------------------------|-------------------------------------|-------------------------|------------------|-----------------------------------|-------------------------------------------------------|----------------------------------------------------------------|-------------------------------------------------------------|
| <b>WT<sup>Ty1</sup></b> | 0                                   | 2                       | 71543618         | 0                                 | 0                                                     |                                                                |                                                             |
|                         | 1                                   | 2                       | 136070104        | 90                                | 7                                                     |                                                                |                                                             |
|                         | 2                                   | 2                       | 80145388         | 56                                | 7                                                     |                                                                |                                                             |
|                         | 3                                   | 2                       | 87752232         | 67                                | 8                                                     |                                                                |                                                             |
| <b>M2<sup>Ty1</sup></b> | 0                                   | 2                       | 34920992         | 1                                 | 0                                                     | 3                                                              | 1                                                           |
|                         | 1                                   | 2                       | 40406616         | 38                                | 9                                                     | 0                                                              | 4                                                           |
|                         | 2                                   | 2                       | 32145250         | 48                                | 15                                                    | 0                                                              | 10                                                          |
|                         | 3                                   | 2                       | 40412816         | 27                                | 7                                                     | 0                                                              | 5                                                           |
| <b>M3<sup>Ty1</sup></b> | 0                                   | 1                       | 9174916          | 0                                 | 0                                                     | 5                                                              | 0                                                           |
|                         | 1                                   | 1                       | 21832818         | 9                                 | 4                                                     | 1                                                              | 3                                                           |
|                         | 2                                   | 1                       | 10254464         | 8                                 | 8                                                     | 2                                                              | 4                                                           |
|                         | 3                                   | 1                       | 22215384         | 19                                | 9                                                     | 2                                                              | 4                                                           |
| <b>M9<sup>Ty1</sup></b> | 0                                   | 1                       | 17521490         | 0                                 | 0                                                     | 2                                                              | 0                                                           |
|                         | 1                                   | 1                       | 24733386         | 23                                | 9                                                     | 0                                                              | 6                                                           |
|                         | 2                                   | 1                       | 21927344         | 9                                 | 4                                                     | 1                                                              | 7                                                           |
|                         | 3                                   | 1                       | 19269712         | 8                                 | 4                                                     | 1                                                              | 2                                                           |

**Table S3**

| <b>Cell line</b>        | <b>ChIP-seq library</b> | <b>Biological Replicate #</b> | <b>Total # of reads</b> | <b>% Reads mapped to genome</b> |
|-------------------------|-------------------------|-------------------------------|-------------------------|---------------------------------|
| <b>WT<sup>Ty1</sup></b> | <b>Total DNA</b>        | <b>1</b>                      | <b>26346282</b>         | <b>84.54</b>                    |
|                         |                         | <b>2</b>                      | <b>16145206</b>         | <b>79.77</b>                    |
|                         | <b>ChIP DNA</b>         | <b>1</b>                      | <b>22906042</b>         | <b>79.40</b>                    |
|                         |                         | <b>2</b>                      | <b>24586106</b>         | <b>79.41</b>                    |
| <b>M2<sup>Ty1</sup></b> | <b>Total DNA</b>        | <b>1</b>                      | <b>44508988</b>         | <b>78.73</b>                    |
|                         |                         | <b>2</b>                      | <b>27140334</b>         | <b>79.92</b>                    |
|                         | <b>ChIP DNA</b>         | <b>1</b>                      | <b>22840750</b>         | <b>66.60</b>                    |
|                         |                         | <b>2</b>                      | <b>23593758</b>         | <b>71.91</b>                    |

**Table S4**

| <b>TSS_ID</b> | <b>1st gene of Leftward TSS</b> | <b>1st gene of Rightward TSS</b> | <b>Start coordinate of first leftward ORF</b> | <b>Start coordinate of first rightward ORF</b> | <b>Comments</b>           |
|---------------|---------------------------------|----------------------------------|-----------------------------------------------|------------------------------------------------|---------------------------|
| Chr 1.1 (L-R) | Tb927.1.890                     | Tb927.1.990                      | 279928                                        | 288567                                         |                           |
| Chr 1.2 (R)   |                                 | Tb927.1.2100                     |                                               | 531517                                         |                           |
| Chr 1.3 (L-R) | Tb927.1.2880                    | Tb927.1.2950                     | 651264                                        | 655620                                         |                           |
| Chr 1.4 (L)   | Tb927.1.3560                    |                                  | 761284                                        |                                                |                           |
| Chr 1.5 (R)   |                                 | Tb927.1.3800                     |                                               | 814232                                         | Downstream from rRNA      |
| Chr 1.6 (R)   |                                 | Tb927.5000                       |                                               | 1004241                                        |                           |
|               |                                 |                                  |                                               |                                                |                           |
| Chr 2.1 (L-R) | Tb927.2.1600                    | Tb927.2.1680                     | 307642                                        | 315628                                         |                           |
| Chr 2.2 (L-R) | Tb927.2.2590                    | Tb927.2.2650                     | 511483                                        | 519545                                         |                           |
| Chr 2.3 (L-R) | Tb927.2.5080                    | Tb927.2.5120                     | 898935                                        | 905712                                         |                           |
| Chr 2.4 (L-R) | Tb927.2.5540                    | Tb927.2.5600                     | 995768                                        | 998939                                         |                           |
| Chr 2.5 (R)   |                                 | Tb927.2.5750                     |                                               | 1031745                                        | Downstream from U2 snRNAs |
|               |                                 |                                  |                                               |                                                |                           |
| Chr 3.1 (L)   | Tb927.3.580                     |                                  | 128330                                        |                                                |                           |
| Chr 3.2 (L-R) | Tb927.3.860                     | Tb927.3.870                      | 201908                                        | 206154                                         |                           |
| Chr 3.3 (R)   |                                 | Tb927.3.1070                     |                                               | 263813                                         |                           |
| Chr 3.4 (L-R) | Tb927.3.2260                    | Tb927.3.2270                     | 586295                                        | 587852                                         |                           |
| Chr 3.5 (L)   | Tb927.3.3410                    |                                  | 874336                                        |                                                |                           |
| Chr 3.6 (R)   |                                 | Tb927.3.3440                     |                                               | 976028                                         |                           |

**Table S4**

|               |              |               |         |          |                                                                       |
|---------------|--------------|---------------|---------|----------|-----------------------------------------------------------------------|
| Chr 3.7 (L)   | Tb927.3.4390 |               | 1229349 |          | Downstream from tRNA                                                  |
| Chr 3.8 (L-R) | Tb927.3.4890 | Tb927.3.4900  | 1373571 | 1375295  |                                                                       |
|               |              |               |         |          |                                                                       |
| Chr 4.1 (L)   | Tb927.4.1190 |               | 314305  |          |                                                                       |
| Chr 4.2 (L-R) | Tb927.4.2080 | Tb927.4.2100  | 535378  | 541988   |                                                                       |
| Chr 4.3 (L-R) | Tb927.4.3740 | Tb927.3750    | 947054  | 971540   |                                                                       |
| Chr 4.4 (L)   | Tb927.4.4660 |               | 1282661 |          |                                                                       |
| Chr 4.5 (L)   | Tb927.4.5070 |               | 1390647 |          |                                                                       |
| Chr 4.6 (L)   | Tb927.4.5390 |               | 1467499 |          |                                                                       |
|               |              |               |         |          |                                                                       |
| Chr 5.1 (L)   | Tb927.5.600  |               | 242846  |          |                                                                       |
| Chr 5.2 (L-R) | Tb927.5.630  | Tb927.5.640   | 269443  | 274270   |                                                                       |
| Chr 5.3 (R)   |              | Tb927.5.670   |         | 295064   |                                                                       |
| Chr 5.4 (R)   |              | Tb927.5.950   |         | 377913   |                                                                       |
| Chr 5.5 (L-R) | Tb927.5.1580 | Tb927.5.1590  | 555436  | 562254   |                                                                       |
| Chr 5.6 (L-R) | Tb927.5.2150 | Tb927.5.2160  | 737918  | 747897   |                                                                       |
| Chr 5.7 (L-R) | Tb927.5.2900 | Tb927.5.2910  | 973702  | 980389   |                                                                       |
| Chr 5.8 (L-R) | Tb927.5.3500 | Tb927.5.3510  | 1157315 | 1159513  |                                                                       |
| Chr 5.9 (L-R) | Tb927.5.4530 | *Tb927.5.4540 | 1389431 | *1398296 | *Rightward 1 <sup>st</sup> ORF is redundant<br>(GRESAG family member) |
|               |              |               |         |          |                                                                       |
| Chr 6.1 (L-R) | Tb927.6.1290 | Tb06.3A7.960  | 476573  | 484320   |                                                                       |

**Table S4**

|                |               |               |           |         |                                           |
|----------------|---------------|---------------|-----------|---------|-------------------------------------------|
| Chr 6.2 (L-R)  | Tb927.6.2150  | Tb927.6.2160  | 685951    | 689752  |                                           |
| Chr 6.3 (L-R)  | Tb927.6.4580  | Tb927.6.4590  | 1278304   | 1285448 |                                           |
|                |               |               |           |         |                                           |
| Chr 7.1 (L-R)  | Tb927.7.920   | Tb927.7.930   | 229403    | 235766  |                                           |
| Chr 7.2 (L-R)  | Tb927.7.2730  | Tb927.7.2740  | 711160    | 716949  |                                           |
| Chr 7.3 (L)    | Tb927.7.3470  |               | 895,705   |         | Downstream from a large non-coding region |
| Chr 7.4 (L-R)  | Tb927.7.3880  | Tb927.7.3890  | 1013751   | 1019310 |                                           |
| Chr 7.5 (L-R)  | Tb927.7.4670  | Tb927.4680    | 1,238,531 | 1243295 |                                           |
| Chr 7.6 (L-R)  | Tb927.7.4960  | Tb927.7.4970  | 1,308,074 | 1317985 |                                           |
| Chr 7.7 (L-R)  | Tb927.7.6430  | Tb927.7.6440  | 1,746,856 | 1748200 |                                           |
| Chr 7.8 (L)    | Tb927.7.6820  |               | 1,889,270 |         |                                           |
| Chr 7.9 (L)    | Tb927.7.6840  |               | 1,900,547 |         | Downstream from a tRNA                    |
| Chr 7.10 (L-R) | Tb927.7.6850# | *Tb927.7.6860 | 1,920,893 | 1928354 | *7.6860 is followed by rRNAs              |
| Chr 7.11 (L)   | Tb927.7.7460  |               | 2,142,378 |         |                                           |
| Chr 7.12 (L-R) | Tb927.7.7480  | Tb927.7.7490  | 2,159,028 | 2164933 |                                           |
|                |               |               |           |         |                                           |
| Chr 8.1 (L-R)  | Tb927.8.1370  | *Tb927.1410   | 445557    | *464007 | *Downstream from rRNA                     |
| Chr 8.2 (L-R)  | Tb927.8.1940  | Tb927.8.1950  | 624115    | 626528  |                                           |
| Chr 8.3 (R)    |               | Tb927.8.2670  |           | 794576  | Downstream from two tRNAs                 |
| Chr 8.4 (L-R)  | Tb927.8.2880  | Tb927.8.2890  | 876190    | 877265  |                                           |
| Chr 8.5 (L)    | Tb927.8.3930  |               | 1172928   |         |                                           |

**Table S4**

|                |               |               |         |         |  |
|----------------|---------------|---------------|---------|---------|--|
| Chr 8.6 (L-R)  | Tb927.8.4890  | Tb927.8.4900  | 1443256 | 1450507 |  |
| Chr 8.7(L-R)   | Tb927.8.5430  | Tb927.8.5440  | 1608351 | 1611644 |  |
| Chr 8.8 (R)    |               | Tb927.8.5940  |         | 1742397 |  |
| Chr 8.9 (L-R)  | Tb927.8.6920  | Tb927.8.6930  | 1994876 | 1999215 |  |
| Chr 8.10 (L-R) | Tb927.8.7350  | Tb927.8.7360  | 2112076 | 2116042 |  |
| Chr 8.11 (R)   |               | Tb927.8.7750  |         | 2244583 |  |
|                |               |               |         |         |  |
| Chr 9.1 (L)    | Tb927.9.1960  |               | 439948  |         |  |
| Chr 9.2 (L)    | Tb927.9.3170  |               | 686,315 |         |  |
| Chr 9.3 (R)    |               | Tb927.9.3280  |         | 693330  |  |
| Chr 9.4 (R)    |               | Tb927.9.3740  |         | 747221  |  |
| Chr 9.5 (R)    |               | Tb927.9.4860  |         | 880706  |  |
| Chr 9.6 (R)    |               | Tb927.9.6830  |         | 1122621 |  |
| Chr 9.7 (L)    | Tb927.9.8880  |               | 1429144 |         |  |
| Chr 9.8 (L)    | Tb927.9.9870  |               | 1566703 |         |  |
| Chr 9.9 (L)    | Tb927.9.11150 |               | 1768768 |         |  |
| Chr 9.10 (R)   |               | Tb927.9.11220 |         | 1774913 |  |
| Chr 9.11 (L-R) | Tb927.9.14520 | Tb927.9.14530 | 2266753 | 2267602 |  |
| Chr 9.12 (R)   |               | Tb927.9.14990 |         | 2341418 |  |
| Chr 9.13 (L-R) | Tb927.9.15890 | Tb927.9.15920 | 2517584 | 2524466 |  |
|                |               |               |         |         |  |

**Table S4**

|                 |                |                |         |         |  |
|-----------------|----------------|----------------|---------|---------|--|
| Chr 10.1 (L-R)  | Tb927.10.120   | Tb927.10.130   | 56675   | 58919   |  |
| Chr 10.2 (L)    | Tb927.10.1220  |                | 329260  |         |  |
| Chr 10.3 (L-R)  | Tb927.10.1670  | Tb927.10.1680  | 448542  | 453284  |  |
| Chr 10.4 (R)    |                | Tb927.10.1800  |         | 476008  |  |
| Chr 10.5 (L-R)  | Tb927.10.2450  | Tb927.10.2460  | 636054  | 638192  |  |
| Chr 10.6 (R)    |                | Tb927.10.3070  |         | 802451  |  |
| Chr 10.7 (L-R)  | Tb927.10.4180  | Tb927.10.4190  | 1100900 | 1104360 |  |
| Chr 10.8 (L-R)  | Tb927.10.4950  | Tb927.10.4970  | 1230829 | 1236490 |  |
| Chr 10.9 (L-R)  | Tb927.10.6410  | Tb927.10.6440  | 1623215 | 1635920 |  |
| Chr 10.10 (L)   | Tb927.10.7500  |                | 1885637 |         |  |
| Chr 10.11 (L)   | Tb927.10.7630  |                | 1923152 |         |  |
| Chr 10.12 (L-R) | Tb927.10.8330  | Tb927.10.8350  | 2058838 | 2064075 |  |
| Chr 10.13 (R)   |                | Tb927.10.9650  |         | 2377684 |  |
| Chr 10.14 (L)   | Tb927.10.10850 |                | 2638240 |         |  |
| Chr 10.15 (L-R) | Tb927.10.11270 | Tb927.10.11280 | 2753738 | 2758131 |  |
| Chr 10.16 (L)   | Tb927.10.12550 |                | 3045879 |         |  |
| Chr 10.17 (L)   | Tb927.10.13020 |                | 3164862 |         |  |
| Chr 10.18 (L)   | Tb927.10.13520 |                | 3302553 |         |  |
| Chr 10.19 (L)   | Tb927.10.14040 |                | 3420396 |         |  |
| Chr 10.20 (L-R) | Tb927.10.14810 | Tb927.10.14850 | 3611738 | 3620341 |  |
|                 |                |                |         |         |  |

**Table S4**

|                 |                |                |         |         |                      |
|-----------------|----------------|----------------|---------|---------|----------------------|
| Chr 11.1 (L-R)  | Tb927.11.720   | Tb927.11.730   | 175002  | 181241  |                      |
| Chr 11.2 (L-R)  | Tb927.11.1920  | Tb927.11.1930  | 562256  | 567362  |                      |
| Chr 11.3 (L-R)  | Tb927.11.3200  | Tb927.11.3230  | 909106  | 922726  |                      |
| Chr 11.4 (R)    |                | Tb927.11.3570  |         | 1057312 |                      |
| Chr 11.5 (L-R)  | Tb927.11.4430  | Tb927.11.4450  | 1287291 | 1291905 |                      |
| Chr 11.6 (R)    |                | Tb927.11.4780  |         | 1378218 |                      |
| Chr 11.7 (L)    | Tb927.11.6310  |                | 1775798 |         |                      |
| Chr 11.8 (L)    | Tb927.11.6720  |                | 1897334 |         | Downstream from tRNA |
| Chr 11.9 (L-R)  | Tb927.11.7970  | Tb927.11.8000  | 2245624 | 2251912 |                      |
| Chr 11.10 (R)   |                | Tb927.11.20730 |         | 2436211 |                      |
| Chr 11.11 (L-R) | Tb927.11.9810  | Tb927.11.9820  | 2650229 | 2657285 |                      |
| Chr 11.12 (R)   |                | Tb927.11.11080 |         | 2966102 |                      |
| Chr 11.13 (R)   |                | Tb927.11.11430 |         | 3058873 |                      |
| Chr 11.14 (R)   |                | Tb927.11.12020 |         | 3222630 |                      |
| Chr 11.15 (L)   | Tb927.11.13120 |                | 3510032 |         | Downstream from tRNA |
| Chr 11.16 (L)   | Tb927.11.13150 |                | 3526193 |         |                      |
| Chr 11.17 (L-R) | Tb927.11.13710 | Tb927.11.13730 | 3651576 | 3655817 |                      |
| Chr 11.18 (L)   | Tb927.11.15370 |                | 4078384 |         |                      |
| Chr 11.19 (L)   | Tb927.11.16170 |                | 4279478 |         |                      |
| Chr 11.20 (L-R) | Tb927.11.17020 | Tb927.11.17040 | 4541418 | 4549949 |                      |
|                 |                |                |         |         |                      |



**Table S5**

| <b>Primers for RT-PCR analysis</b>             |       |                            |
|------------------------------------------------|-------|----------------------------|
| 7SL_SRP RNA                                    | AD703 | TTG GTG TTC TGC TTG GTT GC |
|                                                | AD704 | GTG CTT CTG CAA CGG GAA C  |
| ORFs proximal and distal to Chr 3.4 (L-R) TSSs |       |                            |
| Tb927.3.2180                                   | AD714 | CGCTTTCCCAATGAATGACC       |
|                                                | AD715 | TCCGTTAGTTCCGTTGACGA       |
| Tb927.3.2190                                   | AD691 | CTGGGAAGCCCAGTGAATGC       |
|                                                | AD692 | GTCACGCTCAAGCGGTCCTT       |
| Tb927.3.2250                                   | AD693 | AATGCGTGTGAGGGGCAACT       |
|                                                | AD694 | GACATGCGGACGACAAATGC       |
| Tb927.3.2260                                   | AD695 | GCCCGAAAACGGTTTGAAGA       |
|                                                | AD696 | TACGCTGCTCCCAGCCAGAT       |
| Tb927.3.2270                                   | AD697 | ATGCGTGGGTGACGATTTCC       |
|                                                | AD698 | ATCGACTGCACCACCACCAA       |
| Tb927.3.2280                                   | AD699 | ACACCGTCGCTCACCCAAAT       |
|                                                | AD700 | GTGGAGAACGGACCCGACAT       |
| Tb927.3.2340                                   | AD701 | CCGCGCTCGTCTTCTTTTGT       |
|                                                | AD702 | GCAAGGAAGTGCAGGGTGTG       |
| ORFs proximal and distal to Chr 7.4 (L-R) TSSs |       |                            |
| Tb927.7.3820                                   | AD761 | AATGTGGTTCCTCCCAAACG       |
|                                                | AD762 | AGACAATGATGCGGACGACA       |
| Tb927.7.3830                                   | AD763 | GAACGCACAAACTCGCACTC       |
|                                                | AD764 | AAGGCATGCATCACAAGTGG       |
| Tb927.7.3870                                   | AD765 | CCCGGTTACGTGGCAATAAG       |
|                                                | AD766 | GGATTTGCTCTGCCGTAAA        |
| Tb927.7.3880                                   | AD767 | GCGAAACCCGGTAACTGCTA       |
|                                                | AD768 | CCGAAAAGTCTGCTCCCATC       |
| Tb927.7.3890                                   | AD769 | CCGCAATTCTGCACTCATGT       |
|                                                | AD770 | TCGCAACCGTGGAGAGAATA       |
| Tb927.7.3900                                   | AD771 | GGGGCTTGCATCGATATGTT       |
|                                                | AD772 | AGGTCCTTTCATTGGCGAAA       |
| Tb927.7.3950                                   | AD773 | AGATGCAGGAGGCTCATCGT       |
|                                                | AD774 | CACAGCGTTCTTCTCCAACG       |
| Tb927.7.3970                                   | AD775 | GCCTTCGGCTATTGAACGTC       |
|                                                | AD776 | CTTGCGAAATGCCACAAGAA       |

**Table S5**

| <b>Primers for ChIP-PCR analysis</b> |        |                              |
|--------------------------------------|--------|------------------------------|
| Primers for Chr 3.4 (L-R) region     |        |                              |
| Fragment 1                           | AD746  | CAT ATC CAT GCC CGA AAA AG   |
|                                      | AD747  | CGG TCC TGT CAC TTT CGA TT   |
| Fragment 2                           | AD748  | ATT GAA GGA ATG GCA GGA TG   |
|                                      | AD749  | CTG GCC TTT TCA TTC CCT TT   |
| Fragment 3                           | AD750  | CGA CCC GTT CTA CGT TTG TT   |
|                                      | AD751m | AGT CGC TGT GGG CCG TTA C    |
| Fragment 4                           | AD752m | ACC GCT ATG TTT GGT TCA CT   |
|                                      | AD753m | G GCA GAT TTT CGT CTT CAA AC |
| Fragment 5                           | AD754  | GTG CAC ACG CAC GCA TGT AA   |
|                                      | AD755m | CAA GAA GCG CCG TGA AGC AC   |
| Fragment 6                           | AD756  | CAT GGA GCA ACG CTA ACA TT   |
|                                      | AD757  | TGC GGC ATA GCT GCT AAG AG   |
| Primers for Chr 7.4 (L-R) region     |        |                              |
| Fragment 1                           | AD777  | TAGGAAGCCAAGCGGATGAC         |
|                                      | AD778  | CGGTAAGGTTCCGTGCAAGT         |
| Fragment 2                           | AD779  | AAGAATGCGGTGACAGACGA         |
|                                      | AD780  | ACATCGGCCCAAGGTA ACTC        |
| Fragment 3                           | AD781  | CCACACGCAATTTCAACCAC         |
|                                      | AD782  | CTTTGGGTGGGTTTTTGCTC         |
| Fragment 4                           | AD783  | CGAAACTGATCGTGCAAAGC         |
|                                      | AD784  | AGTGTCTGAGGTCGCTGCAA         |
| Fragment 5                           | AD785  | CCACGCCTTG CATATTAACG        |
|                                      | AD786  | TTACGAGGCCGAAACAAAGG         |
| Fragment 6                           | AD787  | AACGAAGGGTGAGCTCTGGA         |
|                                      | AD788  | GGCTCAACTGATGCCTTTCC         |
| Fragment 7                           | AD789  | GACATAACAGTCCGCGGTGA         |
|                                      | AD790  | GCGTATGTGCGCTGCTAAAC         |
| Fragment 8                           | AD791  | GGCACCTTTCAAACAACGTG         |
|                                      | AD792  | GACCGCACTGTGAAGCAAAA         |
| Fragment 9                           | AD793  | ACTGCGACGTGCTGATGAAG         |
|                                      | AD794  | AGCATGGTGACCGTTTGTTG         |
| Fragment 10                          | AD795  | AAGCTGCGGCTACCTAATCG         |
|                                      | AD796  | ACCCACCGTTCTCACTCAAG         |

## Supplementary Material Table legends

**Table S1:** List of cell lines with the corresponding mutations used in this study and their growth phenotypes. All cell lines are derived from *T. brucei* Lister 427 parasites and in the 29-13 background, which enables tetracycline-induction of both RNAi-mediated endoRPB1 knockdown and expression of all exogenous transgenes. RNA interference (RNAi) target (RIT)-RPB1<sup>Ti</sup> indicates that the cell line contains a tetracycline-inducible RNAi that ablates endogenous RPB1 mRNA by targeting its 3'UTR. Asterisk (\*) indicates Ty1::RPB1<sup>Ti</sup> BSD and Ty1::rpb1<sup>Ti</sup> BSD genes are tetracycline-inducible and RNAi-resistant.

**Table S2:** RNA abundance of endogenous RPB1 and tagged proteins in four cell lines. The table shows number of biological samples (column 3) and total number of reads for each RNA-seq data set (column 4). Total read number and normalized read number mapped to the Ty1-tag sequence are shown (columns 5 and 6). Normalized read number mapped to wild-type (column 7) or the mutated RPB1 sequence in the M2<sup>Ty1</sup>, M3<sup>Ty1</sup> or M9<sup>Ty1</sup> cell line (column 8), before and after 1 to 3 days of tetracycline induction, are shown. In the WT<sup>Ty1</sup> RNA-seq data set, reads mapped to the endogenous and tagged-protein (i.e., exogenous) genes cannot be distinguished.

**Table S3:** ChIP-seq data from WT<sup>Ty1</sup> and M2<sup>Ty1</sup> cell lines. The table shows total number of mapped reads for each ChIP-seq data set (column 4). The percent of mapped reads from total DNA and ChIP DNA from two biological replicate samples of WT<sup>Ty1</sup> and M2<sup>Ty1</sup> are shown (column 5).

**Table S4:** Table contains the 167 TSS used to define genes proximal and distal to putative RNA pol II transcription initiation regions in the genome. This list includes the majority (167 vs. 191) of the putative RNA pol II transcription units identified in 5' end mapping in reference 12 (Table S14. Doi:10.1371). We omitted single-gene units; updated "1st gene of a TSS" based on visual evaluation of current data sets in TriTrypDB. Asterisks in column 2 or 5 refer to information in column 6.

**Table S5:** The oligonucleotide primers used in the reverse transcription-PCR analysis (Fig. S4) and ChIP-PCR analysis (Fig. S7) are listed.
